# Supplementary material for: Anion effect on the structural diversity of three 1D coordination polymers based on a pyridyl diimide ligand
Source: Royal Society of Chemistry journal article supplement (doi:10.1039/c2ce06147c), 2012-01-01
Supplement: c2ce06147c.pdf [file c2ce06147c.pdf]

## Supporting Information

# Anion effect on the structural diversity of three 1D coordination polymers based on a pyridyl diimide ligand

Guo-Bi Li,<sup>a</sup> Jian-Rong He,<sup>a</sup> Jun-Min Liu\*,<sup>a</sup> and Cheng-Yong Su\*<sup>a,b</sup>

### Scheme S1

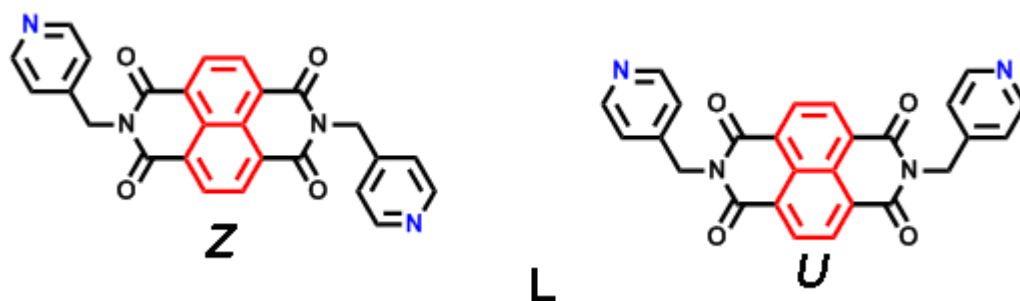

The different conformations of the ligand L (L= 4-pmtd.  
N,N'-bis(4-pyridylmethyl)naphthalene diimide)

### Figure S1

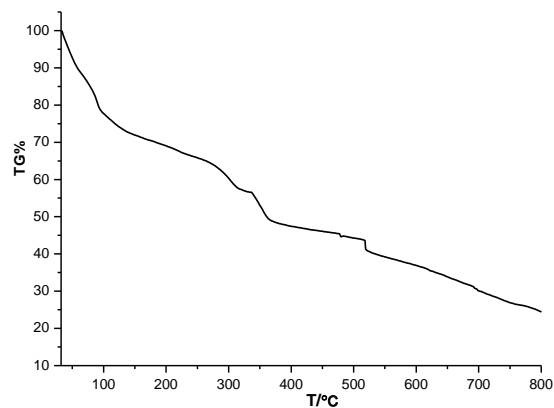

TGA curve of complex 1.

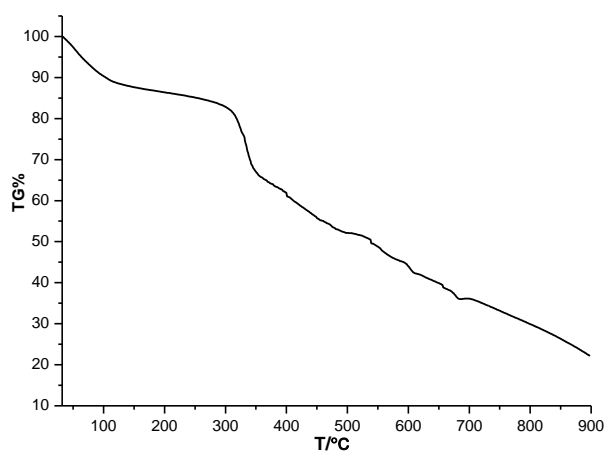

TGA curve of complex 2.

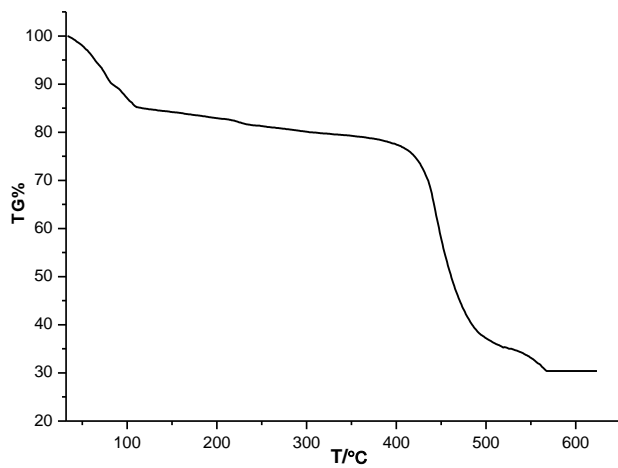

TGA curve of complex 3.

**Figure S2**

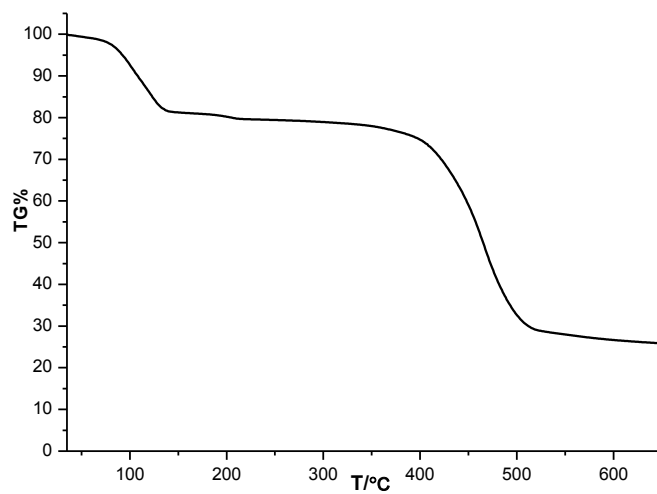

TGA curve of complex **3A**.

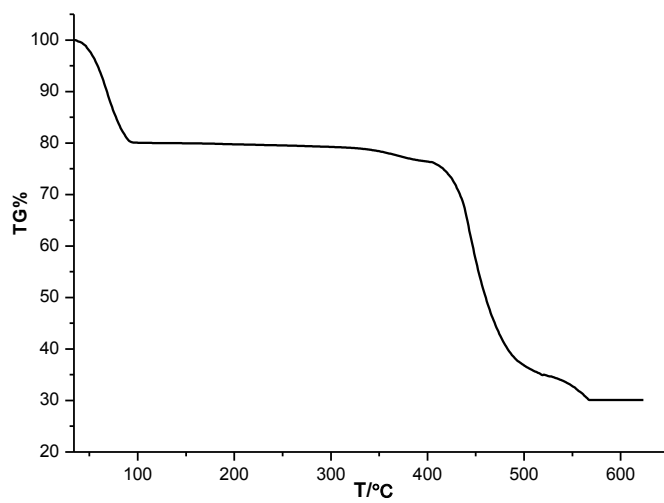

TGA curve of complex **3B**.

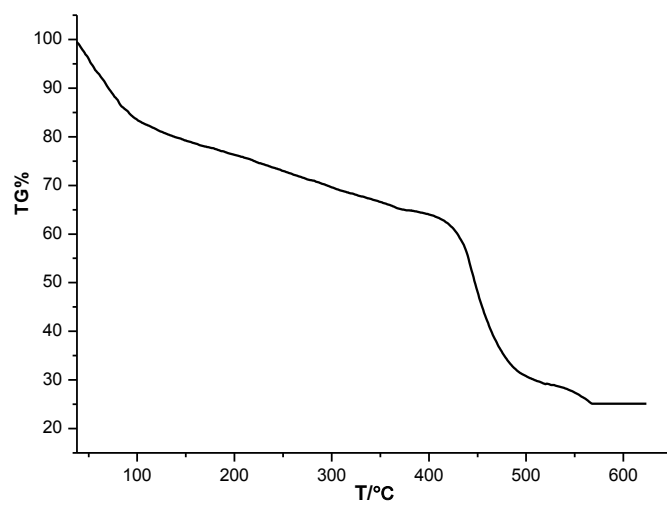

TGA curve of complex 3C.

**Figure S3**

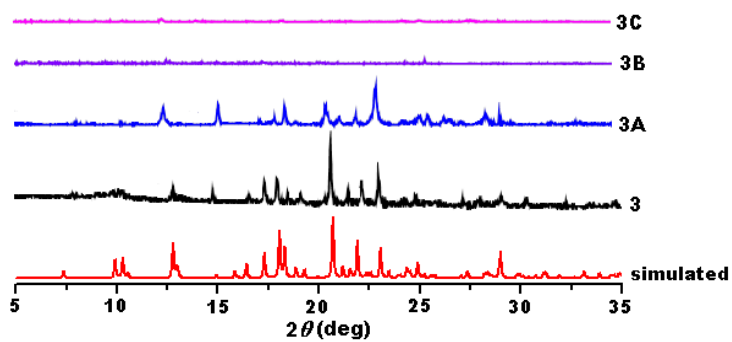

PXRD patterns for complexes 3, 3A, 3B, and 3C.
